# Supplementary material for: Inhibition of Poly(ADP-Ribose) Polymerase in Tumors from BRCA Mutation Carriers
Source: Atypon-hosted journal article supplement (doi:10.1056/nejmoa0900212), 2009-06-24
Supplement: nejm_fong_123sa1.pdf [file nejm_fong_123sa1.pdf]

## Supplementary Appendix

This appendix has been provided by the authors to give readers additional information about their work.

Supplement to: Fong PC, Boss DS, Yap TA, et al. Inhibition of poly(ADP-ribose) polymerase in tumors from *BRCA* mutation carriers. *N Engl J Med* 2009;361:123-34. DOI: 10.1056/NEJMoa0900212.

## SUPPLEMENTARY DATA

### FIGURE LEGENDS

**Supplementary Figure 1: Synthetic lethality induced by PARP inhibition in a *BRCA*-deficient genetic background.** (A) PARP plays a key role in the repair of DNA single-strand breaks that occur all the time as a consequence of normal cell function. (B) When PARP is inhibited, unrepaired single-strand breaks are converted into DNA double-strand breaks during DNA replication. In normal or *BRCA* heterozygous cells (*BRCA*<sup>+/-</sup>) the double-strand breaks are effectively repaired by homologous recombination DNA repair. PARP inhibition is therefore not toxic to cells with wild-type *BRCA1* or *BRCA2*. Tumor-specific defects in *BRCA1* and *BRCA2* lead to a defect in DNA repair by homologous recombination and are, due to this synthetic lethal interaction, exquisitely sensitive to PARP inhibition.<sup>13</sup>

**Supplementary Figure 2:** The structure of olaparib (4-[(3-{{4-cyclopropylcarbonyl}piperazin-1-yl}carbonyl)-4-fluorophenyl)methyl]phthalazin-1(2H)-one, also known as AZD2281 and KU-0059436.<sup>20</sup>

**Supplementary Figure 3: Hair follicle pharmacodynamic biomarker assay.** Analysis of hair follicle cells for induction of  $\gamma$ H2AX foci as a downstream pharmacodynamic endpoint of the predicted mechanism of action of olaparib. The top diagram illustrates how in the setting of loss of PARP function an unrepaired DNA single-strand break (SSB) progresses to a double-strand break (DSB) upon encountering a replication fork;  $\gamma$ H2AX foci are formed in response to the DSB and can be detected by

immunofluorescence labeling as red foci within the blue-stained nucleus in cells treated with a PARP inhibitor (PARPi, lower left).<sup>11</sup> The lower right diagram illustrates how each hair follicle is analyzed on 6 planes and up to 100 nuclei optically assessed by an observer blinded to patient olaparib dose. A cell is scored as positive if  $\geq 10$  small or  $>3$  large foci per nucleus were seen. An immunofluorescence-labeled proliferation marker Ki67 (green) indicates the proliferating nature of the hair follicle surrogate tissue.

**Supplementary Figure 4: Pharmacokinetic studies.** Geometric mean plasma concentration-time profiles following single oral dosing of olaparib to cancer patients. The drug administration schedule was adapted, based on acquired PK-PD data, from once daily (10 mg; 20 mg; 40 mg; 80 mg) to twice daily (60 mg to 600 mg) explaining the altered PK acquisition timepoints.

**Supplementary Figure 5: Diffusion-weighted magnetic resonance imaging (MRI) demonstrating disease regression in a patient with prostate cancer and *BRCA2* mutation associated with a  $>50\%$  decline in PSA.**

A 63-year-old man with *BRCA2* mutation and castration resistant prostate cancer. T1-weighted MR images at the level of the right acetabulum in the pelvis obtained (a) prior to, and (c) three months after, initiating treatment showed no substantial change in a 13 mm low-signal intensity (dark) metastasis in the right acetabulum (arrows). Apparent diffusion coefficient (ADC) maps obtained by diffusion-weighted MRI (b) pre-treatment and (d) at three months after treatment showed ADC values increasing from  $1.03 \times 10^{-3}$

mm<sup>2</sup>/s to  $1.39 \times 10^{-3}$  mm<sup>2</sup>/s (>30% increase) at the site of metastatic disease (circled) consistent with disease regression. (e) T1-weighted image at one year after treatment showed resolution of disease (arrow). *[Images courtesy of Dr Dow-Mu Koh, Royal Marsden Hospital, Sutton, UK].*

**FIGURES**  
**Supplementary Figure 1:**

(A) Repair of DNA single strand breaks by PARP

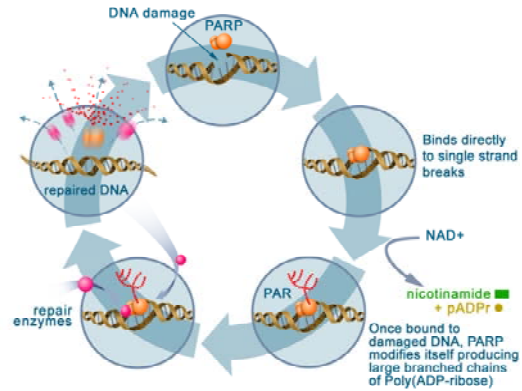

(B) Tumour specific killing by olaparib

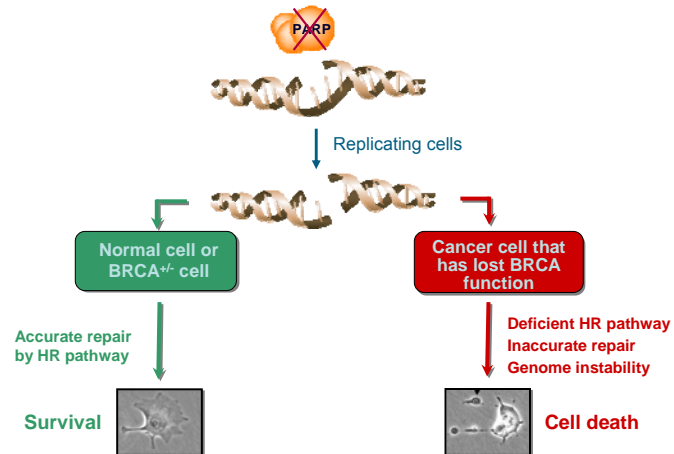

Supplementary Figure 2:

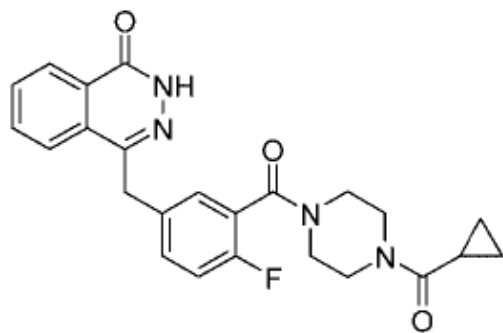

Supplementary Figure 3:

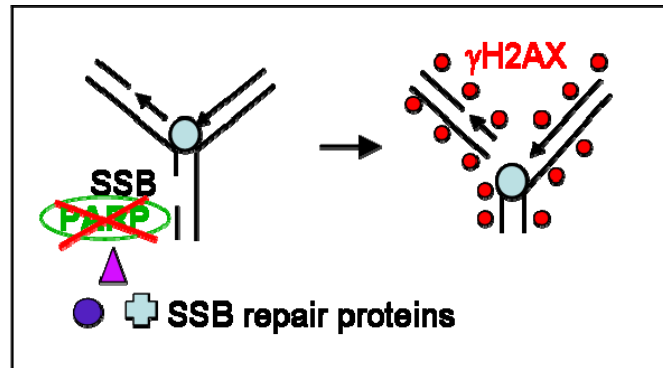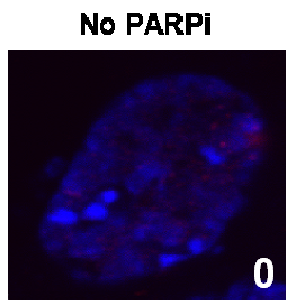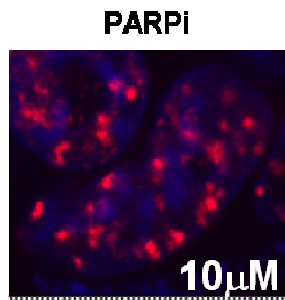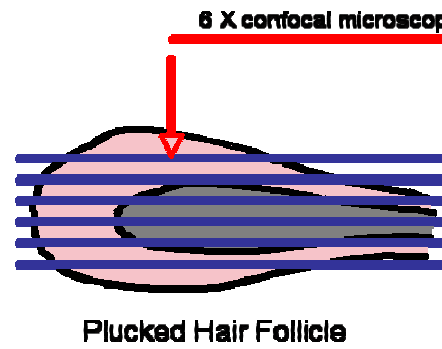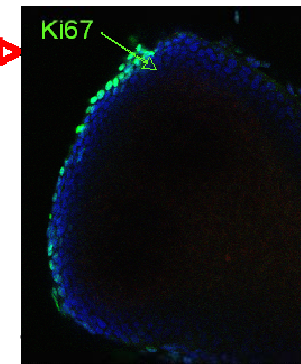

Supplementary Figure 4:

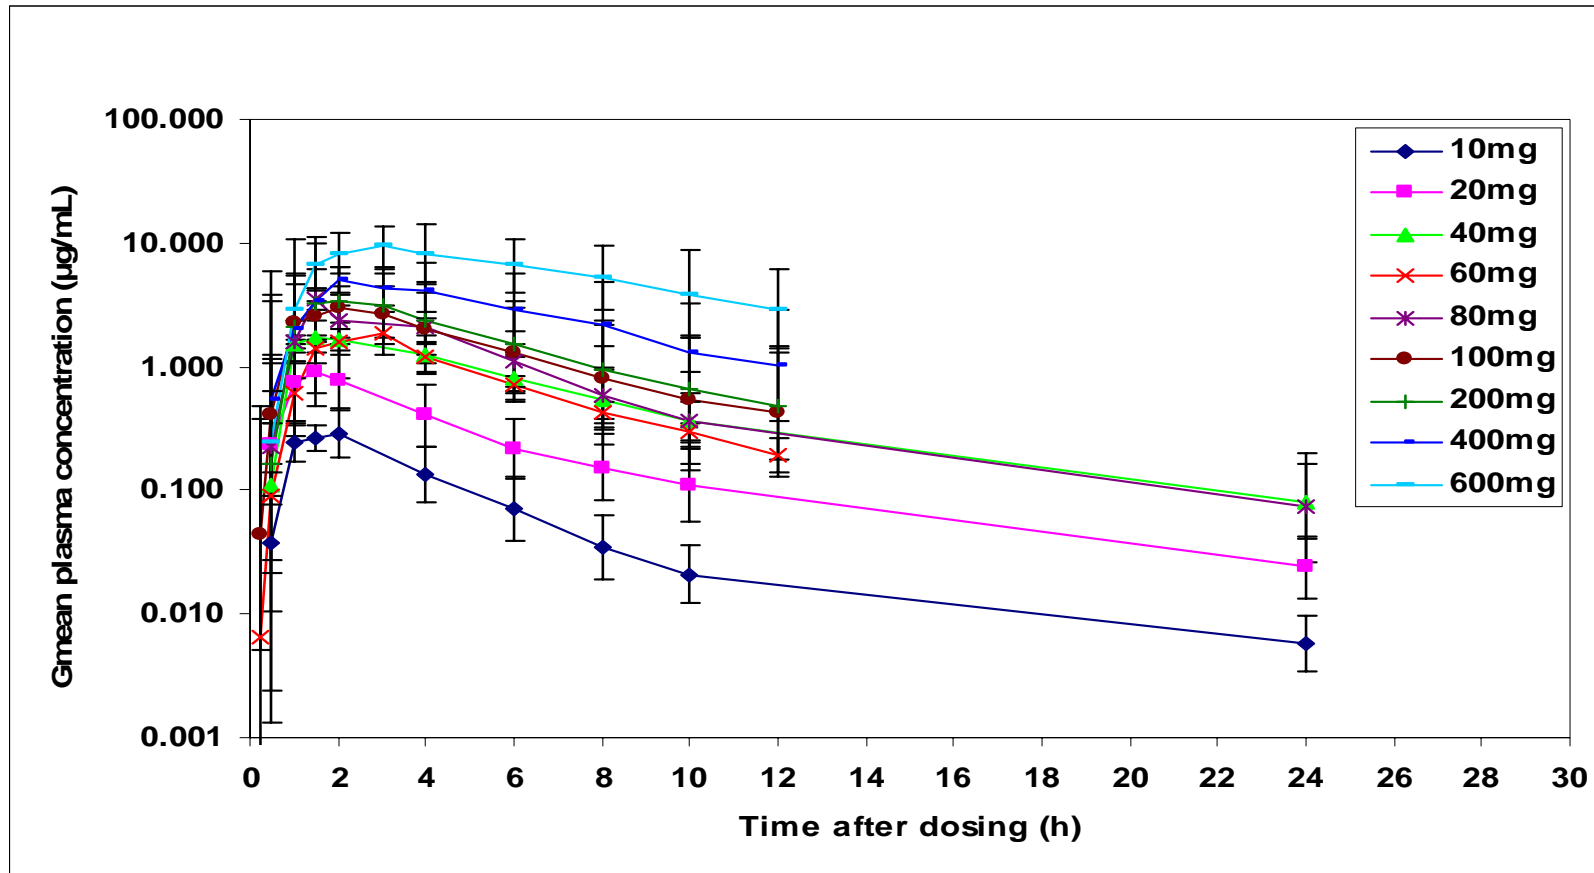

Supplementary Figure 5:

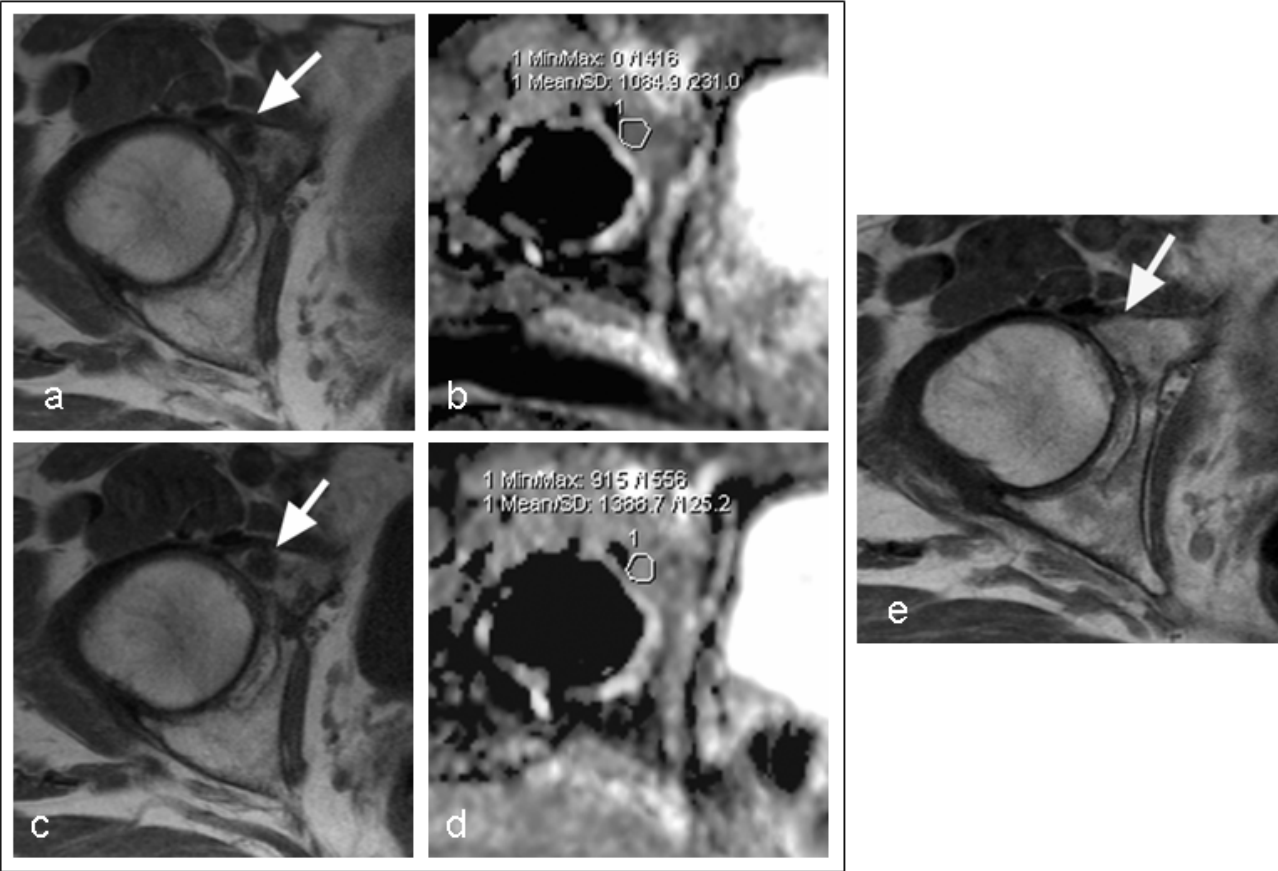

## TABLES

### Supplementary Table 1:

Dose-escalation scheme; dosing schedule was adapted based on the acquired pharmacokinetic-pharmacodynamic data.

| Dose level and schedule       | Number of patients | Total number of cycles | Median number of cycles | Number of dose-limiting toxicities in cycle 1 (%) |
|-------------------------------|--------------------|------------------------|-------------------------|---------------------------------------------------|
| 10 mg daily, 2 out of 3 weeks | 3                  | 12                     | 2                       | 0 (0)                                             |
| 20 mg daily, 2 out of 3 weeks | 3                  | 5                      | 2                       | 0 (0)                                             |
| 40 mg daily, 2 out of 3 weeks | 5                  | 15                     | 2                       | 0 (0)                                             |
| 80 mg daily, 2 out of 3 weeks | 3                  | 9                      | 4                       | 0 (0)                                             |
| 60 mg bid, 2 out of 3 weeks   | 4                  | 10                     | 2                       | 0 (0)                                             |
| 100 mg bid, 2 out of 3 weeks  | 4                  | 15                     | 3                       | 0 (0)                                             |
| 100 mg bid continuously       | 5                  | 8                      | 2                       | 0 (0)                                             |
| 200 mg bid continuously       | 20                 | 94                     | 4                       | 0 (0)                                             |
| 400 mg bid continuously       | 8                  | 41                     | 2.5                     | 1 (12.5)                                          |
| 600 mg bid continuously       | 5                  | 13                     | 2                       | 2 (40)                                            |

## Supplementary Table 2: Supplementary pharmacokinetic data.

Table 2A: Derived pharmacokinetic parameters following administration of a single dose of olaparib at a range of dose levels.

| Parameter                        | Statistic  | Dose (mg)   |             |             |             |             |             |              |             |              |
|----------------------------------|------------|-------------|-------------|-------------|-------------|-------------|-------------|--------------|-------------|--------------|
|                                  |            | 10 (n = 3)  | 20 (n = 3)  | 40 (n = 5)  | 60 (n = 4)  | 80 (n = 3)  | 100 (n = 8) | 200 (n = 20) | 400 (n = 8) | 600 (n = 5)  |
| C <sub>max</sub><br>(µg/ml)      | Gmean (CV) | 0.38 (36)   | 1.04 (81)   | 1.94 (22)   | 2.55 (33)   | 3.49 (20)   | 3.32 (46)   | 4.22 (50)    | 6.08 (22)   | 10.5 (38)    |
|                                  | Range      | 0.25 – 0.48 | 0.46 – 1.66 | 1.50 – 2.68 | 1.95 – 3.77 | 3.02 – 4.35 | 1.68 – 6.77 | 1.69 – 7.88  | 4.04 – 7.47 | 5.90 – 14.5  |
| t <sub>max</sub> (h)             | Median     | 2.0         | 1.5         | 1.5         | 2.25        | 1.5         | 1.0         | 1.5          | 1.75        | 3.0          |
|                                  | Range      | 0.5 – 2.0   | 1.0 – 1.5   | 1.0 – 4.0   | 0.5 – 3.0   | 1.5 – 1.5   | 1.0 – 3.0   | 1.0 – 4.0    | 1.5 – 8.0   | 2.0 – 4.0    |
| AUC <sub>0-12</sub><br>(µg.h/ml) | Gmean (CV) | 1.26* (37)  | 3.74* (52)  | 9.80*(23)   | 9.82 (22)   | 13.2* (43)  | 19.7 (60)   | 20.9**(60)   | 33.5 (47)   | 68.7 (53)    |
|                                  | Range      | 0.92 – 1.86 | 2.29 – 6.07 | 7.12 – 13.3 | 7.47 – 12.2 | 9.25 – 20.8 | 8.95 – 54.9 | 9.71 – 45.8  | 15.8 – 59.5 | 31.4 – 108.9 |
| AUC <sub>0-24</sub><br>(µg.h/ml) | Gmean (CV) | 1.45 (40)   | 4.80 (46)   | 13.1 (30)   | NC          | 16.5 (56)   | NC          | NC           | NC          | NC           |
|                                  | Range      | 1.05 – 2.21 | 3.35 – 7.79 | 9.44 – 20.6 |             | 10.6 – 29.4 |             |              |             |              |
| AUC<br>(µg.h/ml)                 | Gmean (CV) | 1.50 (40)   | 5.04 (44)   | 13.9 (32)   | NC          | 17.1 (59)   | NC          | NC           | NC          | NC           |
|                                  | Range      | 1.10 – 2.31 | 3.62 – 8.11 | 9.97 – 22.9 |             | 10.8 – 31.2 |             |              |             |              |
| t <sub>½</sub> (h)               | Amean (SD) | 6.67 (0.29) | 6.10 (0.48) | 6.14 (0.90) | NC          | 5.48 (0.31) | NC          | NC           | NC          | NC           |
|                                  | Range      | 6.41 – 6.99 | 5.67 – 6.62 | 5.16 – 7.19 |             | 5.12 – 5.66 |             |              |             |              |
| CL/F (L/h)                       | Amean (SD) | 6.97 (2.43) | 4.20 (1.57) | 2.98 (0.85) | NC          | 5.11 (2.44) | NC          | NC           | NC          | NC           |
|                                  | Range      | 4.33 – 9.11 | 2.46 – 5.52 | 1.75 – 4.01 |             | 2.56 – 7.43 |             |              |             |              |
| V/F (L)                          | Amean (SD) | 67.6 (26.0) | 37.6 (16.4) | 25.8 (6.67) | NC          | 39.8 (17.3) | NC          | NC           | NC          | NC           |
|                                  | Range      | 40.0– 91.8  | 20.2 – 52.7 | 18.2 – 36.0 |             | 20.9 – 54.8 |             |              |             |              |

Gmean = geometric mean; CV = coefficient of variation; Amean = arithmetic mean; SD = standard deviation;

NC = not calculated (sampling stopped at 12 hours after dosing)

\* value reported is actually AUC<sub>0-10</sub> because no 12 hour sample was collected

\*\* n = 17

**Table 2B: Derived pharmacokinetic parameters on Day 14 of multiple oral dosing of olaparib at a range of dose levels.**

| Parameter                        | Statistic  | Dose (mg)   |               |             |             |             |             |               |             |              |
|----------------------------------|------------|-------------|---------------|-------------|-------------|-------------|-------------|---------------|-------------|--------------|
|                                  |            | 10 (n = 3)  | 20 (n = 2)    | 40 (n = 4)  | 60 (n = 3)  | 80 (n = 3)  | 100 (n = 8) | 200 (n = 17)  | 400 (n = 6) | 600 (n = 5)  |
| C <sub>max</sub><br>(µg/ml)      | Gmean (CV) | 0.49 (43)   | NC            | 1.78 (7)    | 2.08 (12)   | 4.82 (14)   | 3.67 (31)   | 5.62 (50)     | 7.65 (27)   | 11.5 (42)    |
|                                  | Range      | 0.38 – 0.79 | 1.42 – 1.94   | 1.66 – 1.93 | 1.90 – 2.37 | 4.13 – 5.46 | 2.81 – 5.86 | 2.83 – 17.1   | 5.28 – 10.5 | 6.49 – 17.6  |
| t <sub>max</sub> (h)             | Median     | 1.0         | NC            | 1.75        | 3.0         | 1.5         | 1.5         | 1.5           | 2.0         | 1.5          |
|                                  | Range      | 0.5 – 2.0   | 1.0 – 1.0     | 1.0 – 4.0   | 1.0 – 6.0   | 1.0 – 2.0   | 1.0 – 4.0   | 1.0 – 6.0     | 1.5 – 3.0   | 1.0 – 3.0    |
| C <sub>min</sub> (µg/ml)         | Gmean      | 0.008 (76)  | NC            | 0.12 (37)   | 0.26 (238)  | 0.14 (152)  | 0.45 (90)   | 0.96** (133)  | 1.29 (76)   | 2.18 (177)   |
|                                  | (CV)       | 0.005–      | 0.029 – 0.054 | 0.086 –     | 0.064 –     | 0.060 –     | 0.12 – 0.98 | 0.21 – 2.95   | 0.66 – 3.89 | 0.39 – 5.95  |
|                                  | Range      | 0.018       |               | 0.190       | 1.00        | 0.47        |             |               |             |              |
| AUC <sub>0-12</sub><br>(µg.h/ml) | Gmean      | 1.67* (36)  | NC            | 9.20* (19)  | 11.5 (54)   | 19.0* (30)  | 20.5 (52)   | 33.3** (75)   | 44.9 (39)   | 86.8† (42)   |
|                                  | (CV)       | 1.31 – 2.50 | 4.48 – 6.51   | 7.04 – 10.5 | 7.46 – 20.0 | 13.9 – 25.1 | 10.7 – 48.9 | 11.2 – 162.4  | 27.7 – 78.7 | 55.4 – 119.4 |
|                                  | Range      |             |               |             |             |             |             |               |             |              |
| AUC <sub>0-24</sub><br>(µg.h/ml) | Gmean      | 1.94 (40)   | NC            | 13.0 (21)   | NC*         | 24.5 (40)   | NC*         | NC*           | NC*         | NC*          |
|                                  | (CV)       | 1.48 – 3.03 | 5.38 – 8.06   | 9.54 – 15.0 |             | 16.8 – 36.5 |             |               |             |              |
|                                  | Range      |             |               |             |             |             |             |               |             |              |
| CL <sub>ss</sub> /F (L/h)        | Amean      | 5.39 (1.84) | NC            | 3.13 (0.72) | 5.67 (2.54) | 3.43 (1.29) | 5.38 (2.39) | 7.63** (4.40) | 9.44 (3.35) | 7.31† (1.38) |
|                                  | (SD)       | 3.30 – 6.76 | 2.48 – 3.72   | 2.66 – 4.19 | 2.99 – 8.04 | 2.19 – 4.76 | 2.05 – 9.30 | 1.23 – 17.9   | 5.08 – 14.4 | 5.03 – 10.8  |
|                                  | Range      |             |               |             |             |             |             |               |             |              |
| t <sub>1/2</sub> (h)             | Amean      | NC          | NC            | 9.52 (1.64) | NC          | 8.05 (0.70) | NC          | NC            | NC          | NC           |
|                                  | (SD)       | 8.26 – 12.2 | 9.34 – 12.0   | 7.95 – 11.0 |             | 7.27 – 8.62 |             |               |             |              |
|                                  | Range      |             |               |             |             |             |             |               |             |              |

Gmean = geometric mean; CV = coefficient of variation; Amean = arithmetic mean; SD = standard deviation;

NC = not calculated (n = 2); NC\* = NC (sampling stopped at 12 hours after dosing)

\* value reported is actually AUC<sub>0-10</sub> because no 12 hour sample was collected

\*\* n = 14; † n=3

**Supplementary Table 3: Pharmacogenomics of PARP inhibitors; radiological and biochemical responses for ovarian, breast and prostate cancer patients according to *BRCA1* or *BRCA2* mutation sequence found (where available)**

| Tumor type     | Gene         | Mutation            | Clinical benefit from olaparib <sup>§</sup> | Dose                          |
|----------------|--------------|---------------------|---------------------------------------------|-------------------------------|
| Ovary          | <i>BRCA1</i> | 5382insC            | No                                          | 40 mg qd (2 out of 3 weeks)   |
| Ovary          | –            | Not tested*         | Yes                                         | 100 mg bid (2 out of 3 weeks) |
| Peritoneum     | <i>BRCA1</i> | 3875delGTCT         | No                                          | 100 mg bid (2 out of 3 weeks) |
| Ovary          | <i>BRCA1</i> | 4184del4            | No                                          | 100 mg bid                    |
| Ovary          | <i>BRCA1</i> | 185delAG            | Not evaluable                               | 400 mg bid                    |
| Ovary          | <i>BRCA1</i> | 185delAG            | Yes                                         | 400 mg bid                    |
| Ovary          | <i>BRCA1</i> | 185delAG            | Yes                                         | 400 mg bid                    |
| Fallopian tube | <i>BRCA1</i> | 4184delTCAA         | Yes                                         | 400 mg bid                    |
| Ovary          | <i>BRCA1</i> | 185delAG            | Yes                                         | 400 mg bid                    |
| Ovary          | <i>BRCA1</i> | C.4357+1delG        | Not evaluable                               | 400 mg bid                    |
| Ovary          | <i>BRCA1</i> | Unavailable         | No                                          | 600 mg bid                    |
| Ovary          | <i>BRCA1</i> | 4693delAA           | Yes                                         | 200 mg bid                    |
| Ovary          | <i>BRCA2</i> | 8206T>G             | Yes                                         | 200 mg bid                    |
| Breast         | <i>BRCA2</i> | 3715delG            | Yes                                         | 200 mg bid                    |
| Prostate       | <i>BRCA2</i> | 6174del T           | Yes                                         | 200 mg bid                    |
| Breast         | <i>BRCA2</i> | 902delC             | Yes                                         | 200 mg bid                    |
| Breast         | <i>BRCA2</i> | 4684del4            | No                                          | 200 mg bid                    |
| Ovary          | <i>BRCA1</i> | Deletion exon 15–17 | No                                          | 200 mg bid                    |
| Ovary          | <i>BRCA1</i> | 6kb ins exon 13     | No                                          | 200 mg bid                    |

|       |              |                 |     |            |
|-------|--------------|-----------------|-----|------------|
| Ovary | <i>BRCA1</i> | 5396+1 G>A      | Yes | 200 mg bid |
| Ovary | <i>BRCA1</i> | 1185C>T (Q356X) | Yes | 200 mg bid |

\*Patient with a strong family history of *BRCA*-mutated cancers, but who declined *BRCA* mutation testing

§ Clinical benefit was defined as response by RECIST or accepted tumor marker criteria or disease stabilization ≥4 months.

# Patient was treated off-trial due to incidental brain metastases and subsequently responded systemically to olaparib.

Grayed-out cells denote the 3 most common Ashkenazi founder mutations.
